# Supplementary material for: Shoot-to-root mobile CEPD-like 2 integrates shoot nitrogen status to systemically regulate nitrate uptake in Arabidopsis
Source: Nat Commun. 2020 Jan 31;11:641. doi: 10.1038/s41467-020-14440-8 (PMC6994653; doi:10.1038/s41467-020-14440-8)
Supplement: Supplementary file 1 — Supplementary Information [file 41467_2020_14440_MOESM1_ESM.pdf]

## **Supplementary Information**

### **Shoot-to-root mobile CEPD-like 2 integrates shoot nitrogen status to systemically regulate nitrate uptake in *Arabidopsis***

Ryosuke Ota, Yuri Ohkubo, Yasuko Yamashita, Mari Ogawa-Ohnishi

& Yoshikatsu Matsubayashi\*

*Nature Communications* (2020)

**a**

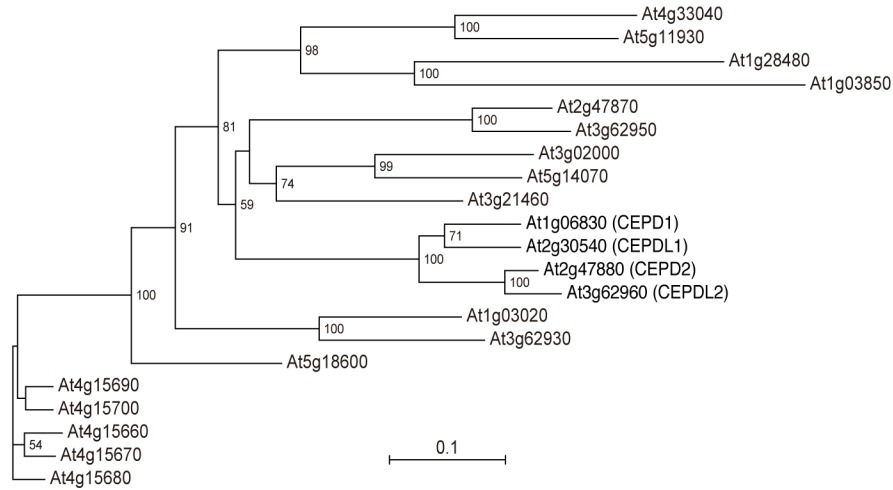

**b**

|                   |    |                                                               |     |
|-------------------|----|---------------------------------------------------------------|-----|
| CEPD1             | 1  | MDKVMRMSSEKGVVIFTKSSCCLSYAVQVLFQDLGVNPKIHEIDKDPECREIEKALMRLG  | 60  |
| CEPD2             | 1  | MDKVMRMSSEKGVVIFTKSSCCLCYAVQILFRDLRVQPTIHEIDNDPDCREIEKALLRLG  | 60  |
| At2g30540 (CEPD1) | 1  | MDKVMRMSSEKGVVIFS KSSCCMSYAVQVLFQDLGVHPTVHEIDKDPECREIEKALMRLG | 60  |
| At3g62960 (CEPD2) | 1  | MDKVMRMSSEKGVVIFTKSSCCLCYAVQILFRDLRVQPTIHEIDNDPDCREIEKALVRLG  | 60  |
| CEPD1             | 61 | CSKPVPVAVFIGGLVGSTNEVMSMHLSSSLVPLVKPYLC---                    | 99  |
| CEPD2             | 61 | CSTAVPAV FVGGKLVGSTNEVMSLHLSGSLVPLIKPYQSILY                   | 102 |
| At2g30540 (CEPD1) | 61 | CSTPVPAT FVGGKLVGSTNEVMSLHLSGSLVPLVKPFQANLC                   | 102 |
| At3g62960 (CEPD2) | 61 | CANAVPAV FVSGKLVGSTNDVMSLHLSGSLVPLIKPYQSFHN                   | 102 |

**c**

|                   |     |                                                                |     |
|-------------------|-----|----------------------------------------------------------------|-----|
| CEPD1             | 1   | ATGGACAAAGTATGAGAATGTCGTCGAAAAAGGGTGGTTATATTACCAAGAGCTCC       | 60  |
| CEPD2             | 1   | ATGGACAAAGTGATGAGAATGTCCTCAGAGAAAGGAGTGGTGATCTTCACGAAAGAGCTCA  | 60  |
| At2g30540 (CEPD1) | 1   | ATGGACAAAGTTGTGAGAATGTCGTCAGAGAAAGGAGTGGTTATTTTACGCAAGAGCTCG   | 60  |
| At3g62960 (CEPD2) | 1   | ATGGACAAAGTTATGAGAATGTCATCGGAGAAAGGAGTGGTGATCTTCACCAAAAGTTCA   | 60  |
| CEPD1             | 61  | TGTTGTTTGTCTATGCGGTTCAAGTTCTCTTCCAGATCTTGGTGTTAACCTTAAGATC     | 120 |
| CEPD2             | 61  | TGTTGTCTCTGCTACGCCGTTCAAATCCTGTTCCGTGACCTTAGGGTTCAACCAACCATC   | 120 |
| At2g30540 (CEPD1) | 61  | TGTTGCATGTCTATGCGGTTCAAGTACTTTTCCAGACCTTGGGGTTCAACCAACAGTC     | 120 |
| At3g62960 (CEPD2) | 61  | TGTTGTCTCTGCTACGCCGTGCAAATCCTTTTCCGTGATCTTAGGGTTCAACCAACAATC   | 120 |
| CEPD1             | 121 | CACGAGATTGATTAAGGACCCGTAATGCGGAGAGATAGAGAAAGGCTCTTATGAGGCTAGGG | 180 |
| CEPD2             | 121 | CACGAGATCGACAACGACCCGAGCTGCGTGAGATCGAGAAAGGCTCTTCTCCGGCTCGGC   | 180 |
| At2g30540 (CEPD1) | 121 | CATGAGATCGATAAAGACCCGTAATGTCGTGAGATCGAGAAAGCCCTAATGAGGTTAGGG   | 180 |
| At3g62960 (CEPD2) | 121 | CACGAGATCGACAACGATCCTGACTGCGTGAGATCGAGAAAGGCTTAGTTCTGCTTGGC    | 180 |
| CEPD1             | 181 | TGTTCAAAGCCGGTCCAGCCGCTCTTCATTGGTGGCAAGCTCGTTGGTTCGACCAACGAA   | 240 |
| CEPD2             | 181 | TGTTCCACGGCGGTTCCAGCTGTCTTTGTGCGGAGGCAAGCTTGTGGTCCACCAATGAA    | 240 |
| At2g30540 (CEPD1) | 181 | TGTTCCACGGCGGTTCCAGCCATCTTTGTGGTGGCAAGCTCATTTGGTTCGACCAATGAA   | 240 |
| At3g62960 (CEPD2) | 181 | TGCGCAACGCGGTTCTGCTGTCTTTGTAAGTGGCAAGCTCGTTGGGTTTCGACCAACGAT   | 240 |
| CEPD1             | 241 | GTAATGTCCATGCACCTAAGCAGCTCGCTCGTTCCCTAGTGAAGCCAT-----AT        | 291 |
| CEPD2             | 241 | GTGATGTCCCTTCACCTTAGTGGCTCTCTGTGCCATTGATCAAAACCTATCA-GTCCAT    | 299 |
| At2g30540 (CEPD1) | 241 | GTGATGTGCTTCACTTAAGCGGCTCGCTGGTTCCGCTAGTTAAGCCGTTTCAAGCCAAAT   | 300 |
| At3g62960 (CEPD2) | 241 | GTGATGTGCTTCACTTAAGTGGCTCGCTCGTTCCCTGATCAAGCCGTTATCA-GTCATT    | 299 |
| CEPD1             | 292 | TTAT-GTTAA                                                     | 300 |
| CEPD2             | 300 | CCTTTACTAG                                                     | 309 |
| At2g30540 (CEPD1) | 301 | CTAT-GTTAA                                                     | 309 |
| At3g62960 (CEPD2) | 300 | TCATAACTAG                                                     | 309 |

**d**

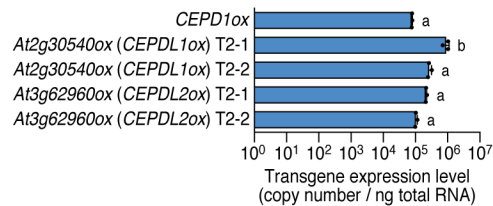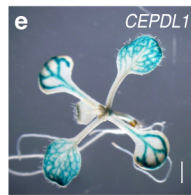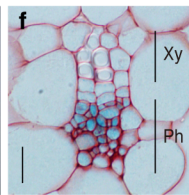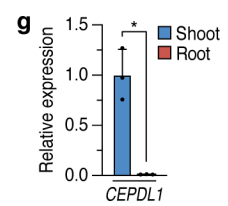

**Supplementary Fig. 1 At2g30540 and At3g62960 upregulate the expression of *NRT2.1* when overexpressed.** **a** Phylogenetic tree of the class III glutaredoxin family proteins. Protein sequences were aligned using ClustalW and the tree was generated with the neighbor-joining method. Bootstrap values (above 50%) from 1000 replicates are indicated at each node. **b** Multiple sequence alignment of At2g30540 (CEPDL1), At3g62960 (CEPDL2) and CEPD1/2 polypeptide amino acid sequences. Identical residues are boxed in black, and similar residues are boxed in gray. **c** Nucleotide sequence alignment of *CEPD/CEPDL* family genes. **d** Absolute quantification of transgene transcripts by qRT-PCR analysis of the roots of 10-day-old transgenic plants overexpressing the indicated gene and grown on N-replete medium. Different letters indicate statistically significant differences ( $P < 0.05$ , two-tailed one-way ANOVA,  $n = 3$ ). **e** Histochemical staining of 10-day-old seedlings transformed with the *CEPDL1pro::GUS* gene. Scale bar = 1 mm. **f** Cross-section of the leaf vascular tissues pictured in 'e'. Scale bar = 10  $\mu\text{m}$ . **g** qRT-PCR analysis of *CEPDL1* transcripts in the shoots and roots of 7-day-old WT plants cultured on 10 mM  $\text{NO}_3^-$  condition (mean  $\pm$  SD,  $*P < 0.05$  by two-tailed non-paired Student's  $t$  test,  $n = 3$ ).

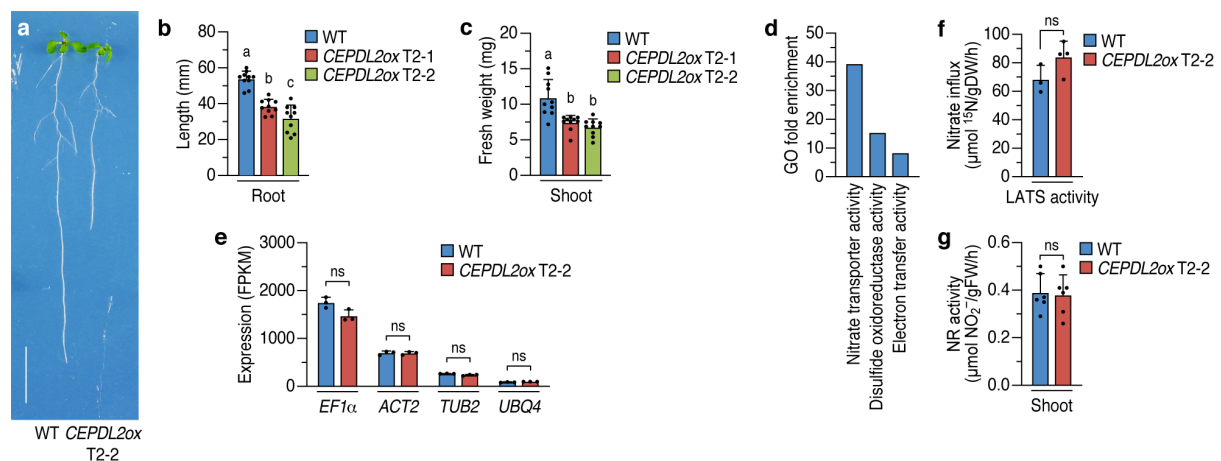

**Supplementary Fig. 2 Phenotypes of *CEPDL2ox* plants.** **a** Phenotypes of 10-day-old WT and *CEPDL2ox* plants grown under 10 mM  $\text{NO}_3^-$  condition. Scale bar = 1 cm. **b** Comparison of root length between 10-day-old WT and *CEPDL2ox* plants (n = 10). **c** Comparison of shoot fresh weight between 14-day-old WT and *CEPDL2ox* plants (n = 10). **d** Gene ontology analysis of the top 150 upregulated genes in *CEPDL2ox* plants. **e** Expression stability of representative reference genes in roots of 10-day-old WT and *CEPDL2ox* plants (n = 3). False discovery rate (FDR)  $q < 0.05$  was considered significant. **f** Calculated LATS activity of the roots of *CEPDL2ox* plants (n = 4). **g** Nitrate reductase (NR) activity in shoots of 17-day-old WT and *CEPDL2ox* plants (n = 6).

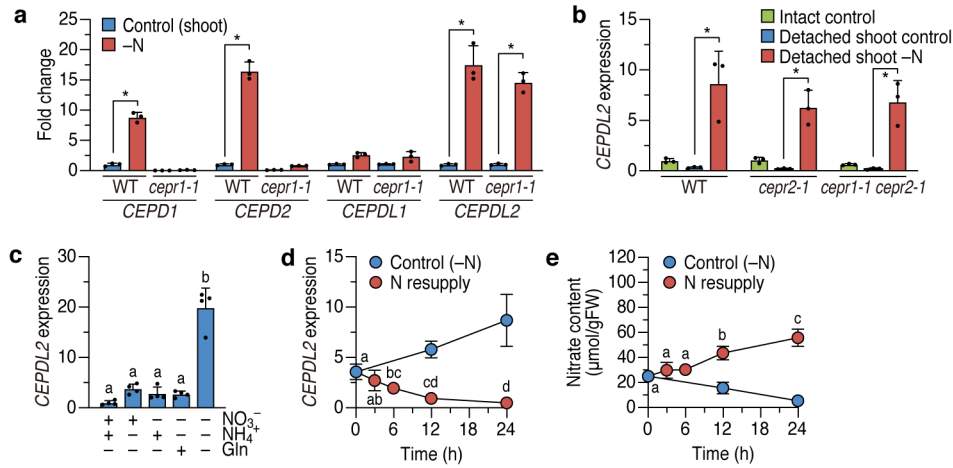

**Supplementary Fig. 3 *CEPDL2* expression is regulated by the shoot N status.** **a** qRT-PCR analysis of *CEPD1/2* and *CEPDL1/2* transcripts in the leaves of 12-day-old WT and *cepr1-1* plants after N starvation for 24 h (n = 3). **b** qRT-PCR analysis of *CEPDL2* transcripts in detached leaves of WT, *cepr2-1* and *cepr1-1 cepr2-1* plants after N starvation for 24 h (n = 3). **c** qRT-PCR analysis of *CEPDL2* transcripts in detached WT leaves treated with various N sources for 24 h (n = 3). **d** Changes in *CEPDL2* transcript levels in WT leaves subjected to N starvation for 24 h, followed by continued N starvation (-N) or N resupply (NH<sub>4</sub><sup>+</sup> 10 mM, NO<sub>3</sub><sup>-</sup> 10 mM) (n = 3). **e** Changes in nitrate content in WT shoots subjected to N starvation for 24 h, followed by continued N starvation (-N) or N resupply (n = 3).

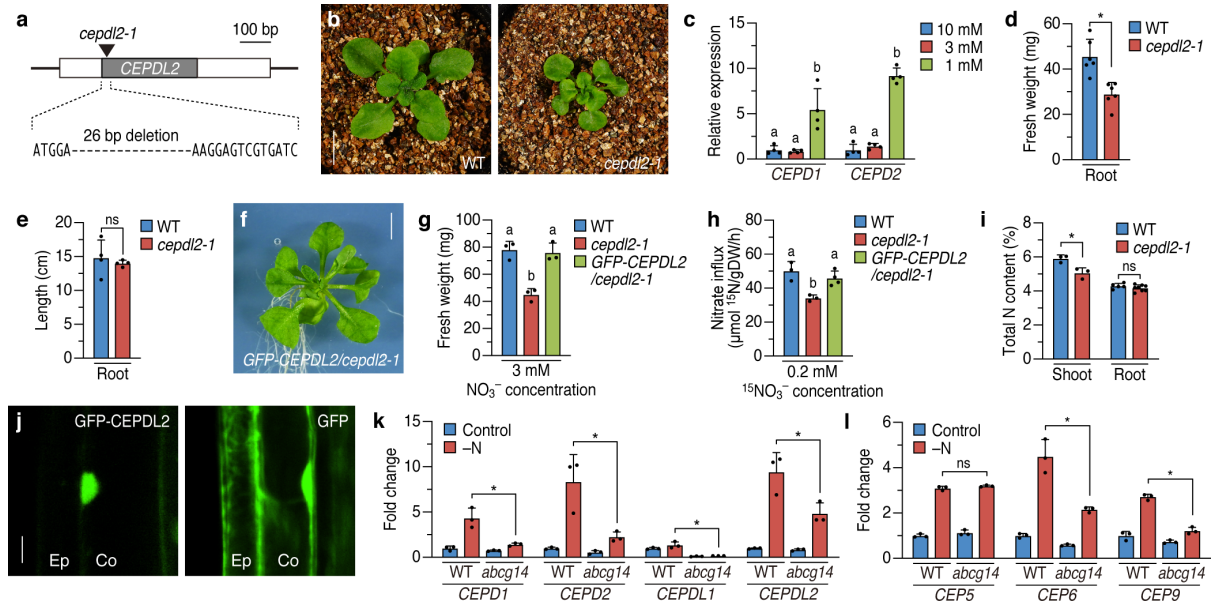

**Supplementary Fig. 4 Loss of *CEPDL2* impairs nitrate acquisition.** **a** Schematic representation of the deletion site in *cepdl2-1*. **b** Phenotypes of 4-week-old WT and *cepdl2-1* plants grown in vermiculite with nutrient solutions containing 3 mM  $\text{NO}_3^-$ . Scale bar = 1 cm. **c** Levels of *CEPD1* and *CEPD2* transcripts in WT shoots grown under various nitrate conditions for 21 d (n = 3). **d** Fresh weight of roots of WT and *cepdl2-1* plants grown under 3 mM  $\text{NO}_3^-$  conditions for 21 d (n = 6). **e** Root length of WT and *cepdl2-1* plants at 21 d (n = 6). **f** Phenotype of 21-day-old *cepdl2-1* mutant plants complemented with *GFP-CEPDL2* under 3 mM  $\text{NO}_3^-$  conditions. Scale bar = 5 mm. **g** Fresh weight of shoots of 21-day-old *cepdl2-1* plants complemented with the *GFP-CEPDL2* (n = 3). **h** Recovery of HATS activity in complemented plants. **i** Total N content in shoots and roots of WT and *cepdl2-1* plants grown under 3 mM  $\text{NO}_3^-$  condition for 21 d. **j** Comparison of GFP signals in the root cortex region of 9-day-old plants expressing *GFP-CEPDL2* under the *CEPDL2* promoter or free GFP under the *NRT2.1* promoter. Scale bar = 10  $\mu\text{m}$ . **k** qRT-PCR analysis of *CEPD1/2* and *CEPD1/2* transcripts in the shoots of 14-day-old WT and *abcg14* plants after N starvation for 24 h (n = 3). **l** qRT-PCR analysis of *CEP* transcripts in the roots of 14-day-old WT and *abcg14* plants after N starvation for 24 h (n = 3).

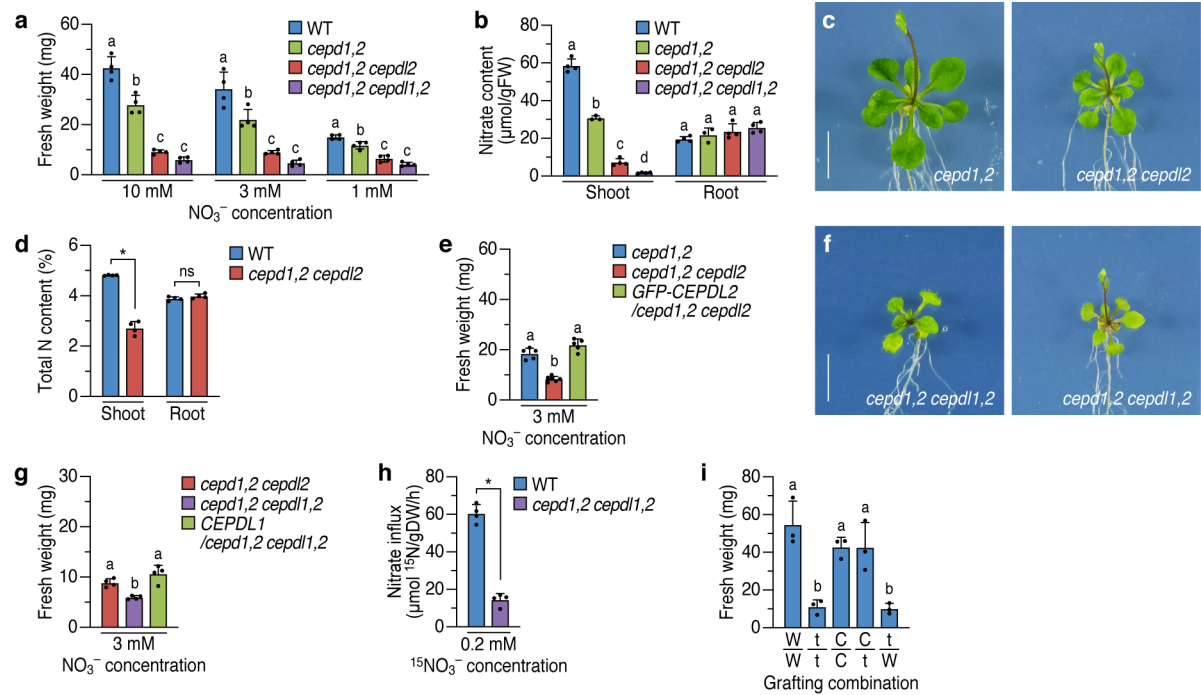

**Supplementary Fig. 5 The CEPDL2 and CEPD1/2 systemically regulate root nitrate acquisition.** **a** Fresh weight of shoots of WT and multiple-mutant plants grown under various  $\text{NO}_3^-$  conditions for 17 d ( $n = 4$ ). **b** Nitrate content in shoots and roots of WT and mutant plants grown under 3 mM  $\text{NO}_3^-$  conditions ( $n = 4$ ). **c** Early flowering phenotypes of 21-day-old multiple-mutant plants grown on 3 mM  $\text{NO}_3^-$  medium. Scale bar = 5 mm. **d** Total N content in shoots and roots of WT and *cepd1,2 cepdl2* triple-mutant plants grown under 3 mM  $\text{NO}_3^-$  conditions for 17 d ( $n = 4$ ). **e** Fresh weight of shoots of 17-day-old *cepd1,2 cepdl2* plants complemented with the *GFP-CEPDL2* construct ( $n = 5$ ). **f** Phenotype of 17-day-old *cepd1,2 cepdl1,2* quadruple mutant plants grown on 3 mM  $\text{NO}_3^-$  medium (left). Early flowering phenotype of 21-day-old quadruple-mutant plants (right). Scale bar = 5 mm. **g** Fresh weight of shoots of 17-day-old *cepd1,2 cepdl1,2* quadruple-mutant plants complemented with the *CEPDL1* genomic fragment ( $n = 4$ ). **h** HATS activity in *cepd1,2 cepdl1,2* quadruple-mutant roots ( $n = 4$ ). **i** Fresh weight of shoots of reciprocally grafted plants ( $n = 3$ ). Abbreviations: W, wild-type; t, *cepd1,2 cepdl2* triple mutant; C, *cepd1,2 cepdl2* triple mutant complemented with *GFP-CEPDL2*.
